# Supplementary material for: Impact of Three Nonsurgical, Full-Mouth Periodontal Treatments on Total Bacterial Load and Selected Pathobionts
Source: MDPI journal article supplement (doi:10.3390/antibiotics11050686), 2022-05-19
Supplement: s1 [file s1]

**Supplementary Table S1.** Sample-specific detection of *Aggregatibacter actinomycetemcomitans* sorted by treatment.

| Treatment | Sample | t0   | t3   | t6  | Treatment | Sample | t0    | t3  | t6  |
|-----------|--------|------|------|-----|-----------|--------|-------|-----|-----|
| Q-SRP     | Ac15   | 0    | 0    | 0   | FMD       | Ac01   | 782   | 340 | 603 |
| Q-SRP     | Ac16   | 727  | 0    | 170 | FMD       | Ac05   | 0     | 0   | 0   |
| Q-SRP     | Ac18   | 0    | 0    | 0   | FMD       | Ac10   | 0     | 0   | 0   |
| Q-SRP     | Ac25   | 0    | 0    | 0   | FMD       | Ac14   | 0     | 0   | 0   |
| Q-SRP     | Ac32   | 0    | 0    | 0   | FMD       | Ac20   | 10132 | 0   | 0   |
| Q-SRP     | Ac35   | 0    | 1311 | 0   | FMD       | Ac26   | 0     | 0   | 0   |
| Q-SRP     | Ac36   | 0    | 0    | 0   | FMD       | Ac30   | 0     | 0   | 0   |
| Q-SRP     | Ac37   | 0    | 0    | 0   | FMD       | Ac52   | 0     | 0   | 0   |
| Q-SRP     | Ac40   | 0    | 0    | 0   | FMD       | Ac56   | 0     | 0   | 0   |
| Q-SRP     | Ac43   | 0    | 0    | 0   | FMD       | Ac64   | 0     | 0   | 0   |
| Q-SRP     | Ac47   | 0    | 0    | 0   | FMD       | Ac65   | 0     | 0   | 0   |
| Q-SRP     | Ac49   | 0    | 0    | 0   | FMD       | Ac68   | 0     | 0   | 0   |
| Q-SRP     | Ac50   | 202  | 0    | 0   | FMD       | Ac76   | 0     | 0   | 0   |
| Q-SRP     | Ac58   | 0    | 0    | 0   | FMD       | Ac77   | 0     | 0   | 0   |
| Q-SRP     | Ac59   | 0    | 0    | 0   | FMD       | Ac78   | 0     | 0   | 0   |
| Q-SRP     | Ac60   | 0    | 0    | 0   | FMD       | Ac79   | 0     | 0   | 0   |
| Q-SRP     | Ac61   | 0    | 0    | 0   | FMD       | Ac82   | 0     | 0   | 0   |
| Q-SRP     | Ha13   | 1666 | 1254 | 538 | FMD       | Ha2    | 0     | 0   | 0   |
| Q-SRP     | Ha27   | 0    | 0    | 0   | FMD       | Ha5    | 0     | 0   | 0   |
| Q-SRP     | Ha31   | 0    | 55   | 0   | FMD       | Ha8    | 0     | 0   | 0   |

|              |      |       |       |     |              |      |       |    |      |
|--------------|------|-------|-------|-----|--------------|------|-------|----|------|
| <b>Q-SRP</b> | Ha32 | 0     | 0     | 0   | <b>FMD</b>   | Ha16 | 0     | 0  | 0    |
| <b>Q-SRP</b> | Ma02 | 0     | 0     | 0   | <b>FMD</b>   | Ha23 | 0     | 0  | 0    |
| <b>Q-SRP</b> | Ma05 | 0     | 0     | 0   | <b>FMD</b>   | Ha33 | 258   | 92 | 8996 |
| <b>Q-SRP</b> | Ma07 | 167   | 72242 | 0   | <b>FMD</b>   | Ma01 | 0     | 0  | 0    |
| <b>Q-SRP</b> | Ma13 | 111   | 0     | 0   | <b>FMD</b>   | Ma04 | 1238  | 0  | 0    |
| <b>FMS</b>   | Ac03 | 0     | 0     | 0   | <b>FMD</b>   | Ma19 | 0     | 0  | 0    |
| <b>FMS</b>   | Ac04 | 0     | 0     | 0   | <b>FMD</b>   | Ma20 | 0     | 0  | 0    |
| <b>FMS</b>   | Ac08 | 0     | 4015  | 109 | <b>FMDAP</b> | Ac02 | 0     | 0  | 0    |
| <b>FMS</b>   | Ac12 | 0     | 0     | 0   | <b>FMDAP</b> | Ac06 | 0     | 0  | 0    |
| <b>FMS</b>   | Ac22 | 21183 | 0     | 0   | <b>FMDAP</b> | Ac07 | 0     | 0  | 0    |
| <b>FMS</b>   | Ac27 | 0     | 0     | 0   | <b>FMDAP</b> | Ac09 | 0     | 0  | 0    |
| <b>FMS</b>   | Ac34 | 0     | 0     | 0   | <b>FMDAP</b> | Ac17 | 0     | 0  | 0    |
| <b>FMS</b>   | Ac41 | 172   | 116   | 0   | <b>FMDAP</b> | Ac19 | 0     | 0  | 0    |
| <b>FMS</b>   | Ac42 | 0     | 0     | 0   | <b>FMDAP</b> | Ac24 | 17910 | 0  | 0    |
| <b>FMS</b>   | Ac44 | 0     | 0     | 0   | <b>FMDAP</b> | Ac29 | 0     | 0  | 0    |
| <b>FMS</b>   | Ac45 | 0     | 0     | 0   | <b>FMDAP</b> | Ac31 | 0     | 0  | 0    |
| <b>FMS</b>   | Ac54 | 0     | 0     | 0   | <b>FMDAP</b> | Ac38 | 0     | 0  | 0    |
| <b>FMS</b>   | Ac55 | 0     | 0     | 0   | <b>FMDAP</b> | Ac39 | 0     | 0  | 0    |
| <b>FMS</b>   | Ac67 | 0     | 0     | 0   | <b>FMDAP</b> | Ac66 | 0     | 0  | 0    |
| <b>FMS</b>   | Ac69 | 0     | 0     | 0   | <b>FMDAP</b> | Ac74 | 0     | 0  | 0    |
| <b>FMS</b>   | Ac70 | 0     | 0     | 0   | <b>FMDAP</b> | Ac75 | 0     | 0  | 0    |
| <b>FMS</b>   | Ac71 | 0     | 0     | 0   | <b>FMDAP</b> | Ac81 | 0     | 0  | 0    |
| <b>FMS</b>   | Ac72 | 0     | 0     | 0   | <b>FMDAP</b> | Ha3  | 0     | 0  | 0    |
| <b>FMS</b>   | Ac73 | 0     | 0     | 0   | <b>FMDAP</b> | Ha10 | 0     | 0  | 579  |

|            |      |       |    |     |              |      |      |     |    |
|------------|------|-------|----|-----|--------------|------|------|-----|----|
| <b>FMS</b> | Ha4  | 0     | 0  | 0   | <b>FMDAP</b> | Ha19 | 0    | 0   | 0  |
| <b>FMS</b> | Ha11 | 13492 | 88 | 220 | <b>FMDAP</b> | Ha24 | 0    | 0   | 0  |
| <b>FMS</b> | Ha17 | 0     | 0  | 0   | <b>FMDAP</b> | Ha26 | 3451 | 494 | 62 |
| <b>FMS</b> | Ha21 | 0     | 0  | 0   | <b>FMDAP</b> | Ma03 | 0    | 0   | 0  |
| <b>FMS</b> | Ha22 | 0     | 0  | 0   | <b>FMDAP</b> | Ma12 | 0    | 0   | 0  |
| <b>FMS</b> | Ha29 | 0     | 0  | 0   | <b>FMDAP</b> | Ma14 | 0    | 0   | 0  |
| <b>FMS</b> | Ma08 | 0     | 0  | 0   | <b>FMDAP</b> | Ma15 | 0    | 0   | 0  |
| <b>FMS</b> | Ma09 | 0     | 0  | 0   | <b>FMDAP</b> | Ma18 | 0    | 0   | 0  |
| <b>FMS</b> | Ma11 | 0     | 0  | 0   |              |      |      |     |    |
